# Supplementary material for: Multiple myeloma: the (r)evolution of current therapy and a glance into the future
Source: PubMed Central journal article supplement — Haematologica. 2020 Jul 23;105(10):2358–67. doi: 10.3324/haematol.2020.247015 (PMC7556665; doi:10.3324/haematol.2020.247015), 2020-07-23
Supplement: 2020_247015-DisclosuresContributions.pdf [file 2020_247015-DisclosuresContributions.pdf]

Haematologica  
HAEMATOL/2020/247015  
Version 3

Multiple myeloma: the (r)evolution of current therapy and a glance into  
future

Annamaria Gulla and Kenneth C. Anderson

Disclosures: Dr. Anderson serves on advisory boards to Celgene, Millennium, Janssen, Sanofi, Bristol Myers Squibb, Gilead, PrecisionBiosciences, and Tolero, and is a Scientific Founder of OncoPep and C4 Therapeutics. The authors have no other relevant conflict of interest to disclose.

Contributions: Both authors equally contributed.
